# Supplementary material
Source: publisher figshare collection journal article supplement (https://asha.figshare.com/ndownloader/files/36344610)
Supplement: Supplementary file 1 [file 36344610]

## Supplemental Material S1. Detailed analyses.

Figure S1 (below) presents detailed results from the same 5 linguistic production articles summarized in the Results section but broken down into type of linguistic comparison (e.g., modality, lexical, or phrasal) and by type of dependent measure (e.g., percent correct or an acoustic measure).

**Figure S1**

*Linguistic production: Detailed Forest Plot of Hedges’ g*

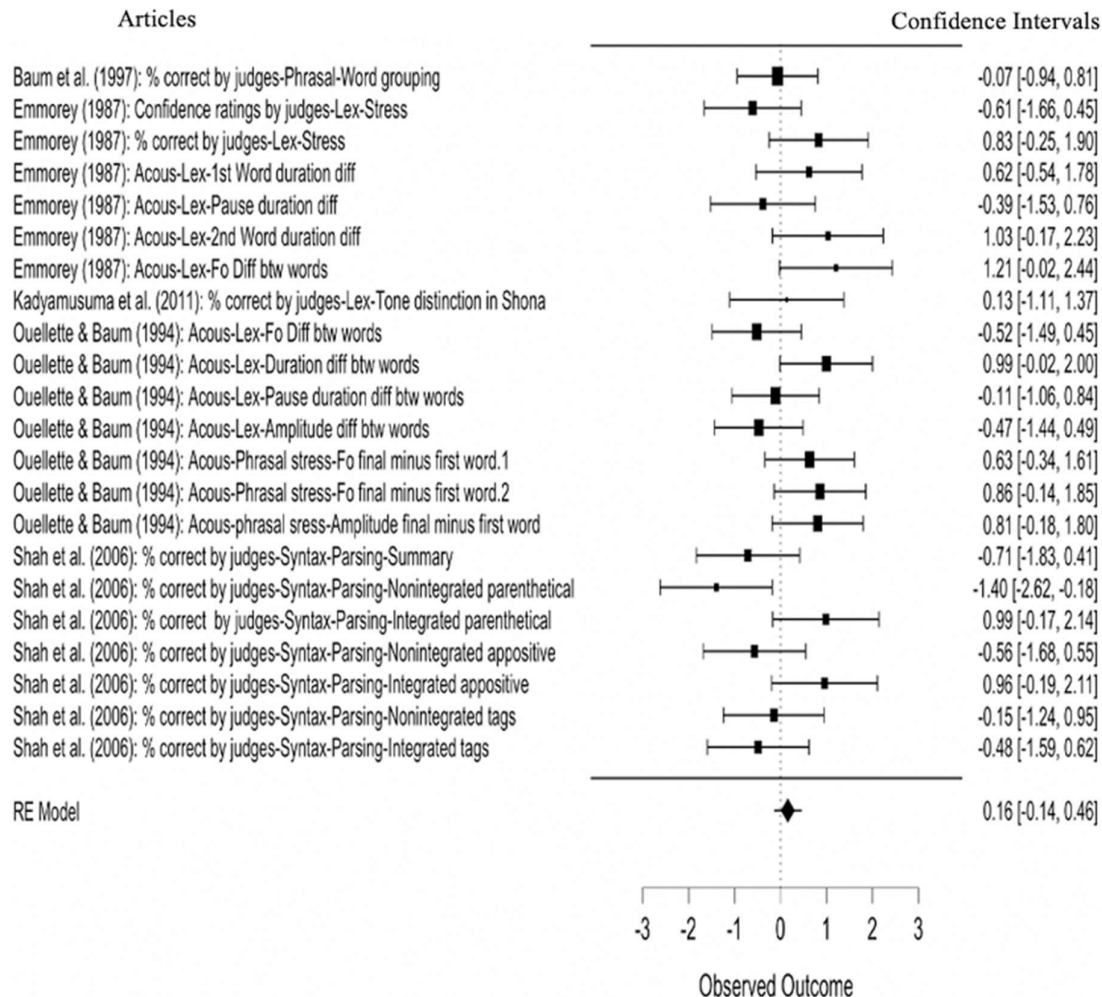

Figure S2 (below) shows individual comparisons from the linguistic comprehension articles broken down by lexical, phrasal, and modality (question, statement, command) distinctions. A RHD advantage is typical, with exceptions.

## Figure S2

### *Linguistic comprehension: Detailed Forest Plot of Hedges’ g*

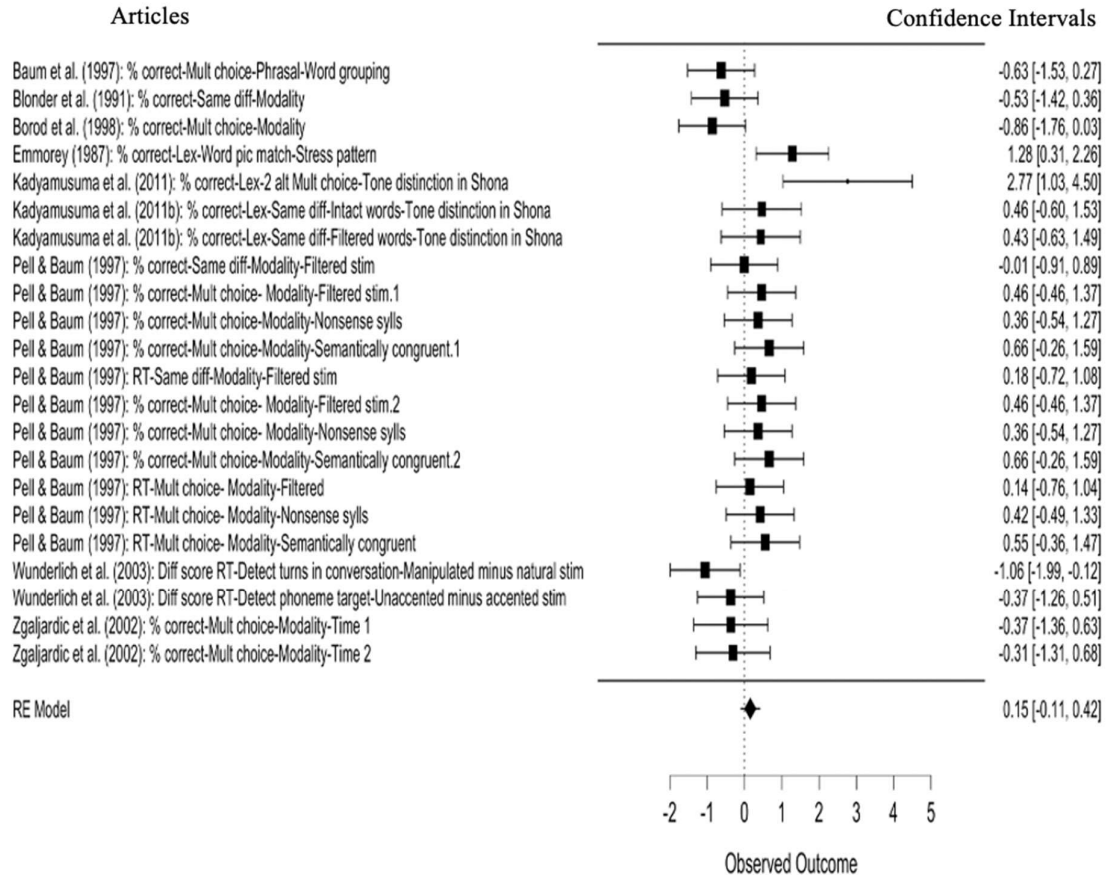

Figure S3 (below) shows individual comparisons from the single emotional production article broken down by task (multiple choice percent correct by judges, intensity ratings by judges) for two time points and for groups with frontal and nonfrontal lesions. Careful examination of the figure shows that the RHD impairment in percent correct got worse from Time 1 to Time 2 for both the Frontal and Nonfrontal sets, as did the intensity measure for the NonFrontal groups. This pattern illustrates the heterogeneity of results observed throughout this literature.

**Figure S3**

*Emotional production: Detailed Forest Plot of Hedges’ g*

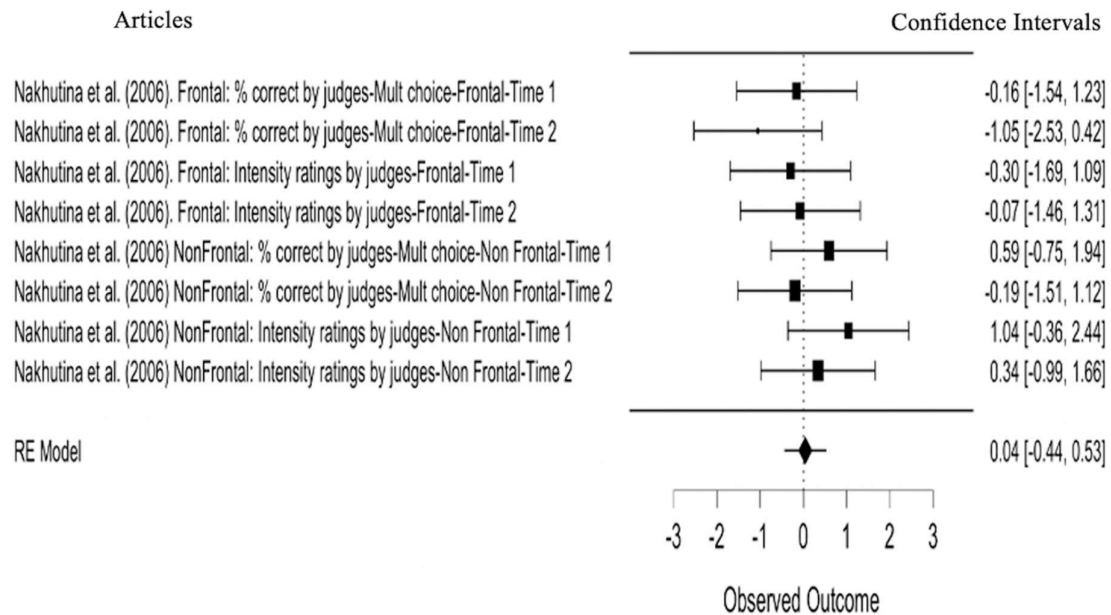

Figure S4 (below) shows the individual comparisons for emotion comprehension and illustrates the different impression if one treats each comparison from a single article as distinct.

**Figure S4**  
*Emotional comprehension: Detailed Forest Plot of Hedges’ g*

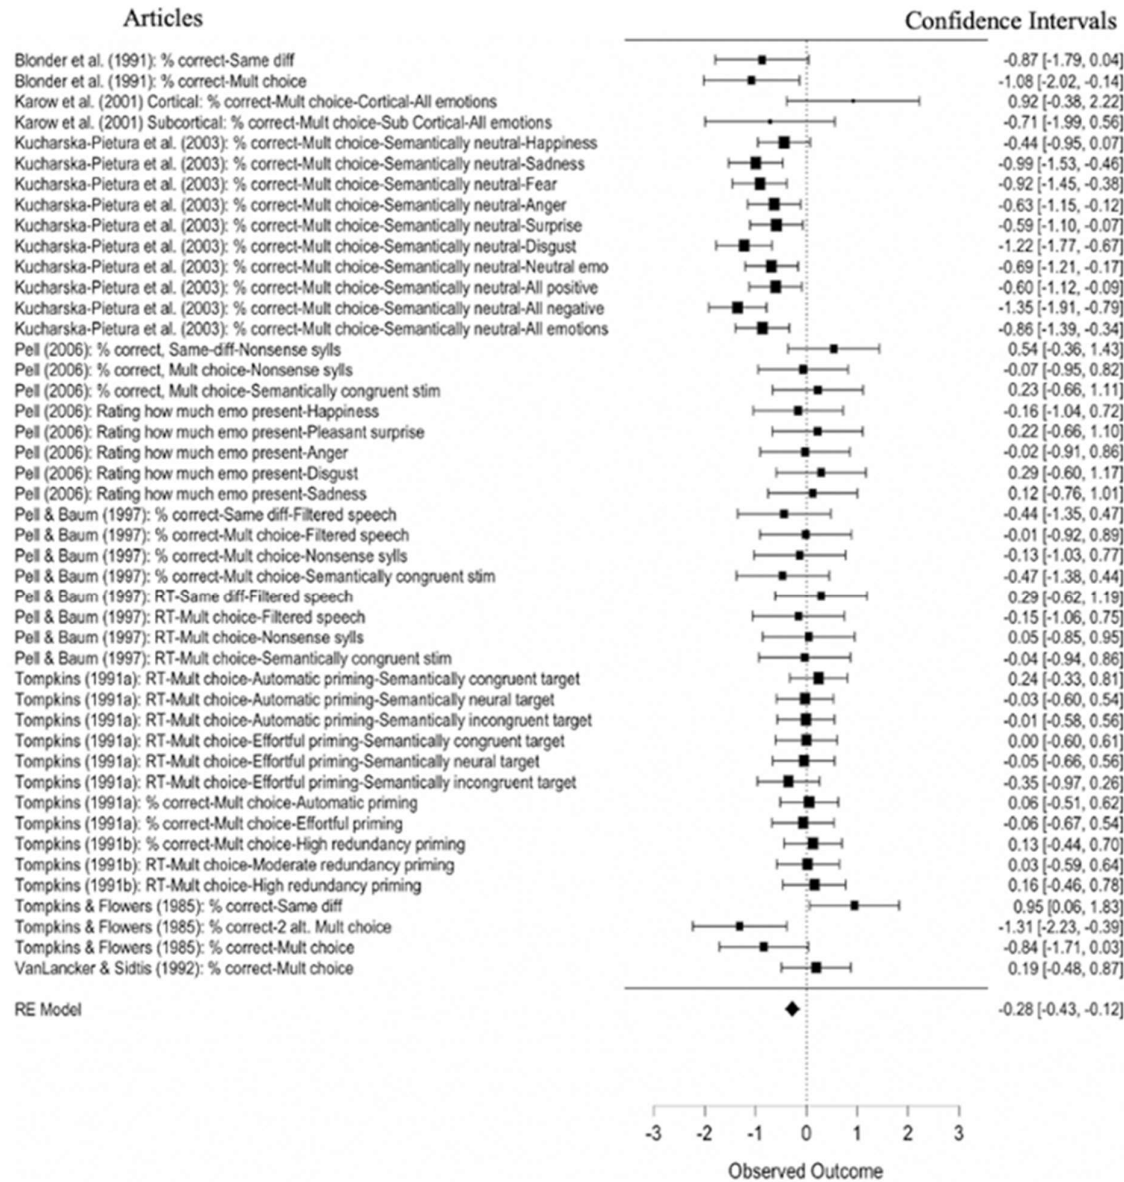

Figure S5 shows the results for Pell (1998). Recall that the Pell 1998 effect sizes are not comparable to others due to the author’s calculation of standard deviations based on differences across condition means rather than based on differences across individual participants; only the direction of effect is interpretable. In addition, the Pell et al. RHD advantage was less than that for the Linguistic comprehension effects obtained from the same individuals.

## Figure S5

### *Pell (1998) Emotional comprehension: Detailed Forest Plot of Hedges’ g*

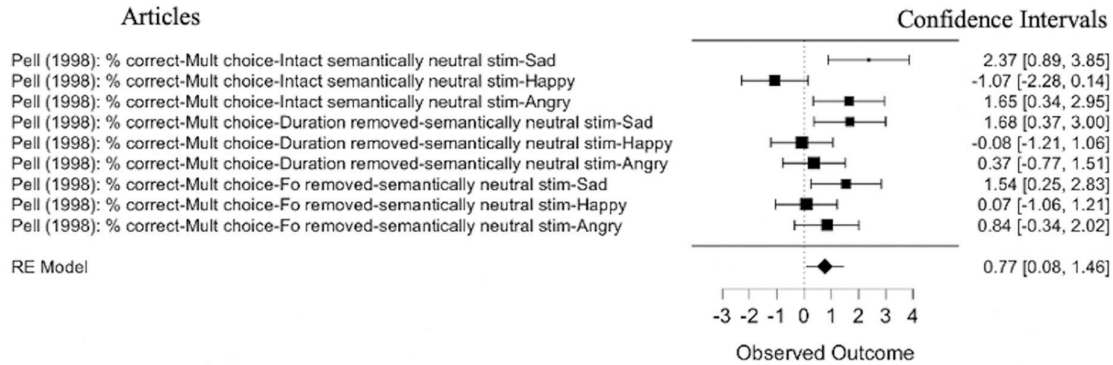

## Forest Plot Labels

### *Linguistic Production*

|                                     |                                                          |                                                                                                                                                                     |
|-------------------------------------|----------------------------------------------------------|---------------------------------------------------------------------------------------------------------------------------------------------------------------------|
| Baum et al. (1997)                  | % correct by judges-<br>Phrasal-Word<br>grouping         | Percent correct by judges Phrases<br>spoken to convey pictorial grouping of<br>3 colored squares: "Pink and black<br>and green", Table 1                            |
| Emmorey (1987)                      | Confidence ratings by<br>judges-Lex-Stress               | Confidence ratings by judges hearing<br>lexical distinctions based on stress,<br>LHD Fl, Nonfl mixed (analysis of<br>table data), Table 3                           |
| Emmorey (1987)                      | % correct by judges-<br>Lex-Stress                       | Percent correct by judges hearing<br>lexical distinctions based on stress,<br>LHD Fl, Nonfl mixed (analysis of<br>table data), Table 3                              |
| Emmorey (1987)                      | Acous-Lex-1st Word<br>duration diff                      | Duration diff of 1st word ("Blue Jay")<br>to convey lexical distinction, RHD,<br>LHD Nonfl only ACOUSTIC, Table 2                                                   |
| Emmorey (1987)                      | Acous-Lex-Pause<br>duration diff                         | Duration diff of pause ("Blue Jay") to<br>convey lexical distinction, RHD, LHD<br>Nonfl only, ACOUSTIC, Table 2                                                     |
| Emmorey (1987)                      | Acous-Lex-2nd Word<br>duration diff                      | Duration diff of 2nd word ("Blue<br>Jay") to convey lexical distinction,<br>RHD, LHD Nonfl only, ACOUSTIC,<br>Table 2                                               |
| Emmorey (1987)                      | Acous-Lex-Fo Diff<br>btw words                           | Pitch Difference between words<br>("Blue Jay") to convey lexical<br>distinction, RHD, LHD Nonfl only,<br>ACOUSTIC, Table 2                                          |
| Kadyamusuma et al.<br>(2011) 25(10) | % correct by judges-<br>Lex-Tone distinction<br>in Shona | Percent correct by judges for lexical<br>distinction distinguished ONLY by<br>tone in Shona Language, (analysis of<br>table data), Table 7                          |
| Ouellette & Baum<br>(1994)          | Acous-Lex-Fo Diff<br>btw words                           | Fund Freq Noun Phrase minus<br>Compound Noun, to distinguish<br>Compound noun vs two-word Adj-N<br>phrase, ACOUSTIC, (analysis of table<br>data), Tables 3-4        |
| Ouellette & Baum<br>(1994)          | Acous-Lex-Duration<br>diff btw words                     | Duration of Noun Phrase minus<br>Compound Noun to distinguish<br>Compound noun vs two-word Adj-N<br>phrase, ACOUSTIC, (analysis of table<br>data), Tables 3-4       |
| Ouellette & Baum<br>(1994)          | Acous-Lex-Pause<br>duration diff btw<br>words            | Pause Duration of Noun Phrase minus<br>Compound Noun to distinguish<br>Compound noun vs two-word Adj-N<br>phrase, ACOUSTIC, (analysis of table<br>data), Tables 3-4 |

|                         |                                                                |                                                                                                                                                                                                                                                         |
|-------------------------|----------------------------------------------------------------|---------------------------------------------------------------------------------------------------------------------------------------------------------------------------------------------------------------------------------------------------------|
| Ouellette & Baum (1994) | Acous-Lex-Amplitude diff btw words                             | Amplitude of Noun Phrase minus Compound Noun to distinguish Compound noun vs two-word Adj-N phrase, ACOUSTIC, (analysis of table data), Tables 3-4<br>Fund Freq of Sentence Final minus Sentence Initial word to indicate stressed position in sentence |
| Ouellette & Baum (1994) | Acous-Phrasal stress-Fo final minus first word                 | ACOUSTIC (analysis of table data) Tables 6-7<br>Duration of Sentence Final word minus Sentence Initial word to indicate stressed position in sentence                                                                                                   |
| Ouellette & Baum (1994) | Acous-Phrasal stress-Fo final minus first word                 | ACOUSTIC (analysis of table data) Tables 6-7<br>Amplitude of Sentence Final word minus Sentence Initial word to indicate stressed position in sentence                                                                                                  |
| Ouellette & Baum (1994) | Acous-phrasal stress-Amplitude final minus first word          | ACOUSTIC (analysis of table data) Tables 6-7                                                                                                                                                                                                            |
| Shah et al. (2006).     | % correct by judges-Syntax-Parsing-Summary                     | Summary percent correct syntactic parsing of ambiguous phrases by judges (analysis of table data), Table 3                                                                                                                                              |
| Shah et al. (2006).     | % correct by judges-Syntax-Parsing-Nonintegrated parenthetical | Parentetical Nonintegrated phrase percent correct syntactic parsing of ambiguous phrases by judges (analysis of table data), Table 3                                                                                                                    |
| Shah et al. (2006).     | % correct by judges-Syntax-Parsing-Integrated parenthetical    | Parentetical Integrated phrase percent correct syntactic parsing of ambiguous phrases by judges (analysis of table data), Table 3                                                                                                                       |
| Shah et al. (2006).     | % correct by judges-Syntax-Parsing-Nonintegrated appositive    | Appositive NonIntegrated phrase percent correct syntactic parsing of ambiguous phrases by judges (analysis of table data), Table 3                                                                                                                      |
| Shah et al. (2006).     | % correct by judges-Syntax-Parsing-Integrated appositive       | Appositive Integrated phrase percent correct syntactic parsing of ambiguous phrases by judges (analysis of table data), Table 3                                                                                                                         |
| Shah et al. (2006).     | % correct by judges-Syntax-Parsing-Nonintegrated tags          | Tags NonIntegrated phrase percent correct syntactic parsing of ambiguous phrases by judges (analysis of table data), Table 3                                                                                                                            |
| Shah et al. (2006).     | % correct by judges-Syntax-Parsing-Integrated tags             | Tags Integrated phrase percent correct syntactic parsing of ambiguous phrases by judges (analysis of table data), Table 3                                                                                                                               |
| Yang et al. (2017)      | % correct by judges-Idomatic vs literal phrases                | Percent correct distinguishing literal vs idiomatic meaning of phrases, judges as unit of statistical analysis                                                                                                                                          |

|                                    |                                                        |                                                                                                                                                  |
|------------------------------------|--------------------------------------------------------|--------------------------------------------------------------------------------------------------------------------------------------------------|
| Yang et al. (2017)                 | Goodness ratings by judges-Idomatic vs literal phrases | Goodness ratings for distinguishing literal vs idiomatic meaning of phrases, judges as unit of statistical analysis                              |
| <i>Emotional Production</i>        |                                                        |                                                                                                                                                  |
| Nakhutina et al. (2006). Frontal   | % correct by judges-Mult choice-Frontal-Time 1         | Percent correct, Ident mult choice several emotions by judges, frontal, TIME1, Table 4                                                           |
| Nakhutina et al. (2006). Frontal   | % correct by judges-Mult choice-Frontal-Time 2         | Percent correct, Ident mult choice several emotions by judges, frontal, TIME2, Table 4                                                           |
| Nakhutina et al. (2006). Frontal   | Intensity ratings by judges-Frontal-Time 1             | Intensity ratings of several emotions by judges, frontal TIME1, Table 4                                                                          |
| Nakhutina et al. (2006). Frontal   | Intensity ratings by judges-Frontal-Time 2             | Intensity ratings of several emotions by judges, frontal, TIME2, Table 4                                                                         |
| Nakhutina et al. (2006) NonFrontal | % correct by judges-Mult choice-Non Frontal-Time 1     | Percent correct, Ident mult choice several emotions by judges, NONfrontal, TIME1, Table 4,                                                       |
| Nakhutina et al. (2006) NonFrontal | % correct by judges-Mult choice-Non Frontal-Time 2     | Percent correct, Ident mult choice several emotions, by judges NONfrontal, TIME2, Table 4                                                        |
| Nakhutina et al. (2006) NonFrontal | Intensity ratings by judges-Non Frontal-Time 1         | Intensity ratings of several emotions by judges, NONfrontal, TIME1, Table 4                                                                      |
| Nakhutina et al. (2006) NonFrontal | Intensity ratings by judges-Non Frontal-Time 2         | Intensity ratings of several emotions by judges, NONfrontal, TIME2, Table 4                                                                      |
| <i>Linguistic Comprehension</i>    |                                                        |                                                                                                                                                  |
| Baum et al. (1997)                 | % correct-Mult choice-Phrasal-Word grouping            | Percent correct, Matching heard phrase ("Pink and black and green") to pictorial grouping of 3 colored squares , Table 2                         |
| Blonder et al. (1991)              | % correct-Same diff-Modality                           | Percent correct Same-Different discrimination: question vs statement, Table 3                                                                    |
| Borod et al. (1998)                | % correct-Mult choice-Modality                         | Percent correct, Identification of modality (mult choice): Question, statement, emphatic, conveyed using nonsense syllables, (24 items), Table 4 |
| Emmorey (1987)                     | % correct-Lex-Word pic match-Stress pattern            | Percent correct, Word Ident based on stress pattern, Word-Picture matching, Nonfluent and fluent LHD data                                        |



|                                  |                                                                             |                                                                                                                                                             |
|----------------------------------|-----------------------------------------------------------------------------|-------------------------------------------------------------------------------------------------------------------------------------------------------------|
|                                  |                                                                             | merged (analysis of table data), Table 1                                                                                                                    |
| Kadyamusuma et al. (2011) 25(10) | % correct-Lex-2 alt<br>Mult choice-Tone distinction in Shona                | Percent correct, Ident of words from 2 alternatives, ONLY tone differences between words in Shona language (analysis of table data), Table 7                |
| Kadyamusuma et al. (2011b) 25(5) | % correct-Lex-Same<br>diff-Intact words-Tone distinction in Shona           | Percent correct, Same-Different discrimination of INTACT 2-syllable words based ONLY on tone in Shona language                                              |
| Kadyamusuma et al. (2011b) 25(5) | % correct-Lex-Same<br>diff-Filtered words-Tone distinction in Shona         | Percent correct, Same-Different discrimination of FILTERED 2-syllable words based ONLY on tone in Shona language                                            |
| Pell (1998)                      | % correct-Sent-<br>Emphatic stress-Mult choice-Initial pos-Intact           | Percent correct. Detect emphatic stress in sentence, BASELINE Initial Sentence position, Mult Choice - 3 alts (begin, middle, end), n=8 conditions, Table 4 |
| Pell (1998)                      | % correct-Sent-<br>Emphatic stress-Mult choice-Final pos-Intact             | Percent correct, Detect emphatic stress in sentence BASELINE Final sentence position, Mult Choice - 3 alts (begin, middle, end) n=8 conditions, Table 4     |
| Pell (1998)                      | % correct-Sent-<br>Emphatic stress-Mult choice-Initial pos-Duration removed | Percent correct, Detect emphatic stress in sent, DURATION REMOVED, Initial sent position, Mult Choice 3 alts (begin, middle, end) n=8 conditions, Table 4   |
| Pell (1998)                      | % correct-Sent-<br>Emphatic stress-Mult choice-Final pos-Duration removed   | Percent correct, Detect emphatic stress in sent, DURATION REMOVED, Final sent, position, Mult Choice - 3 alts (begin, middle, end) n=8 conditions, Table 4  |
| Pell (1998)                      | % correct-Sent-<br>Emphatic stress-Mult choice-Initial pos-Fo removed       | Percent correct, Detect emphatic stress in sent, FUND FREQ REMOVED, Initial sent position, Mult Choice - 3 alts (begin, middle, end) n=8 cond, Table 4      |
| Pell (1998)                      | % correct-Sent-<br>Emphatic stress-Mult choice-Final pos-Fo removed         | Percent correct, Detect emphatic stress in sent, FUND FREQ REMOVED, Final sent position, Mult Choice - 3 alts (begin, middle, end) n=8 cond, Table 4        |
| Pell & Baum (1997)               | % correct-Same diff-Modality-Filtered stim                                  | Percent correct Same-Different discrimination of FILTERED speech different modalities, Table 2                                                              |
| Pell & Baum (1997)               | % correct-Mult choice-Modality-Filtered stim                                | Percent correct Identification of modality of FILTERED speech (mult                                                                                         |

|                          |                                                                           |                                                                                                                                                                                                                                                                                                                                                                        |
|--------------------------|---------------------------------------------------------------------------|------------------------------------------------------------------------------------------------------------------------------------------------------------------------------------------------------------------------------------------------------------------------------------------------------------------------------------------------------------------------|
| Pell & Baum (1997)       | % correct-Mult choice-Modality-Nonsense sylls                             | choice 3- alternatives: question, statement, imperative), Table 4<br>Percent correct Identification of modality of NONSENSE syllables, (mult choice 3- alternatives: question, statement, imperative), Table 4<br>Percent correct identification of modality in SEMANTICALLY CONGRUENT stimuli, (mult choice 3- alternatives: question statement, imperative), Table 4 |
| Pell & Baum (1997)       | % correct-Mult choice-Modality-Semantically congruent                     | Reaction time Same-Different discrimination of FILTERED stimuli different modalities, Table 2                                                                                                                                                                                                                                                                          |
| Pell & Baum (1997)       | RT-Same diff-Modality-Filtered stim                                       | Percent correct, Iden (3 alts: ques, statement, imperative), FILTERED stimuli, Table 4                                                                                                                                                                                                                                                                                 |
| Pell & Baum (1997)       | % correct-Mult choice-Modality-Filtered stim                              | Percent correct, Iden (3 alts: ques, statement, imperative), NONSENSE syll stimuli, Table 4                                                                                                                                                                                                                                                                            |
| Pell & Baum (1997)       | % correct-Mult choice-Modality-Nonsense sylls                             | Percent correct, Identification of modality (3 alts: ques, statement, imperative), SEMANTICALLY CONGRUENT stimuli, Table 4                                                                                                                                                                                                                                             |
| Pell & Baum (1997)       | % correct-Mult choice-Modality-Semantically congruent                     | Reaction time, Identification of modality (3 alts: ques, statement, imperative), FILTERED stimuli, Table 5                                                                                                                                                                                                                                                             |
| Pell & Baum (1997)       | RT-Mult choice-Modality-Filtered                                          | Reaction time, Identification of modality (3 alts: ques, statement, imperative), NONSENSE syll stimuli, Table 5                                                                                                                                                                                                                                                        |
| Pell & Baum (1997)       | RT-Mult choice-Modality-Nonsense sylls                                    | Reaction time, Identification of modality (3 alts: ques, statement, imperative), SEMANTICALLY CONGRUENT stimuli, Table 5                                                                                                                                                                                                                                               |
| Pell & Baum (1997)       | RT-Mult choice-Modality-Semantically congruent                            | Reaction time difference score: Manipulated minus Natural stim, detect turn taking in conversation, higher values better, Table 3                                                                                                                                                                                                                                      |
| Wunderlich et al. (2003) | Diff score RT-Detect turns in conversation-Manipulated minus natural stim | Reaction time difference score:: Unaccented minus Accented stim, detect phoneme target w/wo sentential stress, higher values better?, Table 4                                                                                                                                                                                                                          |
| Wunderlich et al. (2003) | Diff score RT-Detect phoneme target-Unaccented minus accented stim        | Number correct, Ident Mult choice modality 3 alts (statement, question, exclamation) TIME 1 (24 items), Table 3                                                                                                                                                                                                                                                        |
| Zgaljardic et al. (2002) | % correct-Mult choice-Modality-Time 1                                     |                                                                                                                                                                                                                                                                                                                                                                        |

|                                     |                                                                 |                                                                                                                   |
|-------------------------------------|-----------------------------------------------------------------|-------------------------------------------------------------------------------------------------------------------|
| Zgaljardic et al. (2002)            | % correct-Mult choice-<br>Modality-Time 2                       | Number correct, Ident Mult choice 3<br>alts (statement, question, exclamation)<br>TIME 2 (24 items), Table 3      |
| <i>Emotional<br/>Comprehension</i>  |                                                                 |                                                                                                                   |
| Blonder et al. (1991)               | % correct-Same diff                                             | Percent correct, Same-Different<br>discrim of emotions, Table 3                                                   |
| Blonder et al. (1991)               | % correct-Mult choice                                           | Percent correct, Identification of<br>emotion (mult choice) from set of 5,<br>Table 3                             |
| Karow et al. (2001)<br>Cortical     | % correct-Mult choice-<br>Cortical-All emotions                 | Number correct, Ident (mult choice<br>out of 4 (happy, sad, angry, neutral)<br>CORTICAL (20 ITEMS), Table 5       |
| Karow et al. (2001)<br>Subcortical  | % correct-Mult choice-<br>Sub Cortical-All<br>emotions          | Number correct, Ident (mult choice<br>out of 4 (happy, sad, angry, neutral)<br>SUBCORTICAL (20 ITEMS), Table<br>5 |
| Kucharska-Pietura et<br>al. (2003). | % correct-Mult choice-<br>Semantically neutral-<br>Happiness    | Percent correct, Ident 6-alt mult<br>choice, Semantically neutral<br>sentences, HAPPINESS, Table 3                |
| Kucharska-Pietura et<br>al. (2003). | % correct-Mult choice-<br>Semantically neutral-<br>Sadness      | Percent correct, Ident 6-alt mult<br>choice, Semantically neutral<br>sentences, SADNESS, Table 3                  |
| Kucharska-Pietura et<br>al. (2003). | % correct-Mult choice-<br>Semantically neutral-<br>Fear         | Percent correct, Ident 6-alt mult<br>choice, Semantically neutral<br>sentences, FEAR, Table 3                     |
| Kucharska-Pietura et<br>al. (2003). | % correct-Mult choice-<br>Semantically neutral-<br>Anger        | Percent correct, Ident 6-alt mult<br>choice, Semantically neutral<br>sentences, ANGER, Table 3                    |
| Kucharska-Pietura et<br>al. (2003). | % correct-Mult choice-<br>Semantically neutral-<br>Surprise     | Percent correct, Ident 6-alt mult<br>choice, Semantically neutral<br>sentences, SURPRISE, Table 3                 |
| Kucharska-Pietura et<br>al. (2003). | % correct-Mult choice-<br>Semantically neutral-<br>Disgust      | Percent correct, Ident 6-alt mult<br>choice, Semantically neutral<br>sentences, DISGUST, Table 3                  |
| Kucharska-Pietura et<br>al. (2003). | % correct-Mult choice-<br>Semantically neutral-<br>Neutral emo  | Percent correct, Ident 6-alt mult<br>choice, Semantically neutral<br>sentences, NEUTRAL, Table 3                  |
| Kucharska-Pietura et<br>al. (2003). | % correct-Mult choice-<br>Semantically neutral-<br>All positive | Percent correct, Ident 6-alt mult<br>choice, Semantically neutral<br>sentences, ALL POSITIVE, Table 3             |
| Kucharska-Pietura et<br>al. (2003). | % correct-Mult choice-<br>Semantically neutral-<br>All negative | Percent correct, Ident 6-alt mult<br>choice, Semantically neutral<br>sentences, ALL NEGATIVE, Table 3             |
| Kucharska-Pietura et<br>al. (2003). | % correct-Mult choice-<br>Semantically neutral-<br>All emotions | Percent correct, Ident 6-alt mult<br>choice, Semantically neutral<br>sentences, TOTAL, Table 3                    |

|             |                                                                                   |                                                                                                                                                                     |
|-------------|-----------------------------------------------------------------------------------|---------------------------------------------------------------------------------------------------------------------------------------------------------------------|
| Pell (1998) | % correct-Mult choice-<br>Intact semantically<br>neutral stim-Sad                 | Percent correct Ident mult choice 3<br>alt: sad, happy, angry, BASELINE =<br>INTACT stim, only SAD, n=6<br>conditions as unit of statistical<br>analysis, Table 5   |
| Pell (1998) | % correct-Mult choice-<br>Intact semantically<br>neutral stim-Happy               | Percent correct Ident mult choice 3<br>alt: sad, happy, angry, BASELINE<br>=INTACT stim, only HAPPY, n=6<br>conditions as unit of statistical<br>analysis, Table 5  |
| Pell (1998) | % correct-Mult choice-<br>Intact semantically<br>neutral stim-Angry               | Percent correct Ident mult choice 3<br>alt: sad, happy, angry, BASELINE =<br>INTACT stim, only ANGRY, n=6<br>conditions as unit of statistical<br>analysis, Table 5 |
| Pell (1998) | % correct-Mult choice-<br>Duration removed-<br>semantically neutral<br>stim-Sad   | Percent correct Ident mult choice 3<br>alt: sad, happy, angry, DURATION<br>REMOVED, only SAD, n=6<br>conditions as unit of statistical<br>analysis, Table 5         |
| Pell (1998) | % correct-Mult choice-<br>Duration removed-<br>semantically neutral<br>stim-Happy | Percent correct Ident mult choice 3<br>alt: sad, happy, angry, DURATION<br>REMOVED, only HAPPY, n=6<br>conditions as unit of statistical<br>analysis, Table 5       |
| Pell (1998) | % correct-Mult choice-<br>Duration removed-<br>semantically neutral<br>stim-Angry | Percent correct Ident mult choice 3<br>alt: sad, happy, angry, DURATION<br>REMOVED, only ANGRY, n=6<br>conditions as unit of statistical<br>analysis, Table 5       |
| Pell (1998) | % correct-Mult choice-<br>Fo removed-<br>semantically neutral<br>stim-Sad         | Percent correct Ident mult choice 3<br>alt: sad, happy, angry, FUND FREQ<br>REMOVED, only SAD, n=6<br>conditions as unit of statistical<br>analysis, Table 5        |
| Pell (1998) | % correct-Mult choice-<br>Fo removed-<br>semantically neutral<br>stim-Happy       | Percent correct Ident mult choice 3<br>alt: sad, happy, angry, FUND FREQ<br>REMOVED, only HAPPY, n=6<br>conditions as unit of statistical<br>analysis, Table 5      |
| Pell (1998) | % correct-Mult choice-<br>Fo removed-<br>semantically neutral<br>stim-Angry       | Percent correct Ident mult choice 3<br>alt: sad, happy, angry, FUND FREQ<br>REMOVED, only ANGRY, n=6<br>conditions as unit of statistical<br>analysis, Table 5      |
| Pell (2006) | % correct, Same-diff-<br>Nonsense sylls                                           | Correct, Same-different discrim of<br>emotion in Nonsense syllables, Table<br>3                                                                                     |

|                    |                                                                |                                                                                                        |
|--------------------|----------------------------------------------------------------|--------------------------------------------------------------------------------------------------------|
| Pell (2006)        | % correct, Mult choice-Nonsense sylls                          | Correct, Ident of emotion (Mult choice) out of 5. Pure prosody-- Nonsense syllables, Table 3           |
| Pell (2006)        | % correct, Mult choice-Semantically congruent stim             | Correct, Ident of emotion (Mult Choce) out of 5 prosody, SEMANTICALLY CONGRUENT content, Table 3       |
| Pell (2006)        | Rating how much emo present-Happiness                          | Rating how much target emo present: happiness, Table 3                                                 |
| Pell (2006)        | Rating how much emo present-Pleasant surprise                  | Rating how much target emo present: pleasant surprise, Table 3                                         |
| Pell (2006)        | Rating how much emo present-Anger                              | Rating how much target emo present: anger, Table 3                                                     |
| Pell (2006)        | Rating how much emo present-Disgust                            | Rating how much target emo present: disgust, Table 3                                                   |
| Pell (2006)        | Rating how much emo present-Sadness                            | Rating how much target emo present: sadness, Table 3                                                   |
| Pell & Baum (1997) | % correct-Same diff-Filtered speech                            | Percent correct, Same-Different discrim of emotion, FILTERED SPEECH, Table 2                           |
| Pell & Baum (1997) | % correct-Mult choice-Filtered speech                          | Percent correct, Ident of emotion (Mult Choice) from 3 (happy, sad, angry) FILTERED SPEECH, Table 4    |
| Pell & Baum (1997) | % correct-Mult choice-Nonsense sylls                           | Percent corrcect, Ident of emotion (Mult Choice) from 3 (happy, sad, angry) NONSENSE SYLLs, Table 4    |
| Pell & Baum (1997) | % correct-Mult choice-Semantically congruent stim              | Percent correct, Ident of emotion (Mult Choice) from 3 (happy, sad, angry) CONGRUENT SEMANTIC, Table 4 |
| Pell & Baum (1997) | RT-Same diff-Filtered speech                                   | Reaction time, Same-Different discrim of emotion, filtered speech, Table 2                             |
| Pell & Baum (1997) | RT-Mult choice-Filtered speech                                 | Reaction time, Ident of emotion (Mult Choice) from 3 (happy, sad, angry) FILTERED SPEECH, Table 5      |
| Pell & Baum (1997) | RT-Mult choice-Nonsense sylls                                  | Rection time, Ident of emotion (Mult Choice) from 3 (happy, sad, angry) NONSENSE SYLLs, Table 5        |
| Pell & Baum (1997) | RT-Mult choice-Semantically congruent stim                     | Reaction time, Ident of emotion (Mult Choice) from 3 (happy, sad, angry) CONGRUENT SEMANTIC, Table 5   |
| Tompkins (1991a)   | RT-Mult choice-Automatic priming-Semantically congruent target | Reaction time, Automatic Priming Task to ident emotion, Semantically CONGRUENT, Table 4                |
| Tompkins (1991a)   | RT-Mult choice-Automatic priming-                              | Reaction time, Automatic Priming Task to ident emotion, Semantically NEUTRAL , Table 4, *** KEEP       |

|                            |                                                                  |                                                                                                           |
|----------------------------|------------------------------------------------------------------|-----------------------------------------------------------------------------------------------------------|
|                            | Semantically neural target                                       |                                                                                                           |
| Tompkins (1991a)           | RT-Mult choice-Automatic priming-Semantically incongruent target | Reaction time, Automatic Priming Task to ident emotion, Semantically INCONGRUENT, Table 4                 |
| Tompkins (1991a)           | RT-Mult choice-Effortful priming-Semantically congruent target   | Reaction time, Effortful Priming Task to ident emotion, Semantically CONGRUENT, Table 4                   |
| Tompkins (1991a)           | RT-Mult choice-Effortful priming-Semantically neural target      | Reaction time, Effortful Priming Task to ident emotion, Semantically NEUTRAL, Table 4, **** KEEP          |
| Tompkins (1991a)           | RT-Mult choice-Effortful priming-Semantically incongruent target | Reaction time, Effortful Priming Task to ident emotion, Semantically INCONGRUENT, Table 4                 |
| Tompkins (1991a)           | % correct-Mult choice-Automatic priming                          | Number correct (60), AUTOMATIC Priming Task to ident emotion, Table 3                                     |
| Tompkins (1991a)           | % correct-Mult choice-Effortful priming                          | Number correct (60), EFFORTFUL Priming Task to ident emotion, Table 3                                     |
| Tompkins (1991b)           | % correct-Mult choice-High redundancy priming                    | Percent correct, HIGH redundancy Priming Task, to ident emotion (happy, angry, afraid neutral), Table 3   |
| Tompkins (1991b)           | RT-Mult choice-Moderate redundancy priming                       | Reaction time, MODERATE redundancy Priming Task, to ident emotion (happy, angry, afraid neutral), Table 3 |
| Tompkins (1991b)           | RT-Mult choice-High redundancy priming                           | Reaction time, HIGH redundancy Priming Task, to ident emotion (happy, angry, afraid neutral), Table 3     |
| Tompkins & Flowers (1985)  | % correct-Same diff                                              | Percent correct, Same-Different Discrim of emotion, Table 2                                               |
| Tompkins & Flowers (1985)  | % correct-2 alt. Mult choice                                     | Percent correct, Mood I Iden mult choice of emotion from set of 2 alternatives, Table 2                   |
| Tompkins & Flowers (1985)  | % correct-Mult choice                                            | Percent correct, Mood II Iden mult choice from set of 4 alternatives, Table 2                             |
| VanLancker & Sidtis (1992) | % correct-Mult choice                                            | Percent correct, Ident of emotion Mult Choice from 4 alts. (sad, happy, angry, surprised)                 |
